# Supplementary material for: Mixed reality three dimensional visualization facilitates repair of posterior urethral rupture after pelvic fracture
Source: Research Square preprint supplement (doi:10.21203/rs.3.rs-7760466/v1), 2025-11-17
Supplement: Supplementary file 1 [file e2e466692e29ed024bac6ed5.docx]

Tab. 1 Physician/Patient evaluation of the urethral model

| Variables | Patients (n=32, Mean ± SD) | Physicians (n=6, Mean ± SD) | | | |
| --- | --- | --- | --- | --- | --- |
|  | understandability | Assessment of the stricture | Accurate calculation of stricture length | Relationship to the pubic symphysis | Relationship to the rectum |
| Urethrogram | 3.5± 0.5 | 7.5 | 8.0 | 6.5 | 6.0 |
| Urethroscopy | 4.0 ± 0.7 | 7.5 | N/A | N/A | N/A |
| Mixed Reality 3D Visualization Reconstruction | 9.5 ± 0.6 | 9.5 | 10 | 10 | 9.0 |
| P Value | <0.05 | <0.05 | <0.05 | <0.05 | <0.05 |

Mean scores for the understandability and utility of the MR 3D visualization model as evaluated by physicians (n=6) and patients (n=32). Scores range from 1 (least useful) to 10 (most useful).

Tab. 2 Patient and surgery data

| Variables |  |
| --- | --- |
| Age (years) | 43.5 ± 12.2 |
| Previous surgery before anastomosis |  |
| Yes | 11 |
| No | 21 |
| Pubic symphysis excision  Yes | 8 |
| No | 24 |
| Etiology |  |
| PFUI | 32 |
| Stricture length (cm) |  |
| Urethrogram | 2.7（Mean） |
| Urethroscopy | N/A |
| Mixed Reality 3D Visualization Model | 3.1（Mean） |
| Surgery | 3.0（Mean） |
| Distance from proximal urethra to rectum (cm) |  |
| Urethrogram | N/A |
| Urethroscopy | N/A |
| Mixed Reality 3D Visualization Model | 0.5（Mean） |
| Surgery | 0.5（Mean） |
| Pubic symphysis incision (Length, width, depth cm)  Urethrogram | N/A |
| Urethroscopy | N/A |
| Mixed Reality 3D Visualization Model | 0.8*08*0.6（Mean） |
| Surgery | 0.8*0.8*0.8（Mean） |
| N/A, not applicable |  |

Comparative analysis of intraoperative parameters between mixed reality-assisted (MR group, n=32) and conventional approach (control group, n=30). The MR group demonstrated a modest reduction in operative time (118 ± 15 min vs 130 ± 20 min, mean difference -12 min, 95% CI [-25.3, 1.3], p=0.17) with comparable estimated blood loss between groups (150 ± 40 mL vs 160 ± 35 mL, p=0.32)

Tab. 3 Comparison of Data Concerning the Application of Mixed-Reality 3D Visualization Technology in Urethral Repair Surgery

| Variables | Experimental Group (Mixed Reality 3D Visualization Technology) | Control Group (Traditional Methods) | P value |
| --- | --- | --- | --- |
| Age (years, mean ± SD) | 43.55 ± 12.2 | 44.30 ± 5.5 | 0.95 |
| Urethral Defect Length (cm, mean ± SD) | 3.1 ± 0.8 | 3.0 ± 0.9 | 0.78 |
| Pubic Symphysectomy (Number of Cases) | 8 | 7 | 0.91 |
| Blood Loss Volume (ml, mean ± SD) | 150 ± 50 | 180 ± 60 | 0.63 |
| Surgery Time (minutes, mean ± SD) | 118 ± 20 | 130 ± 25 | 0.17 |
| Length of Hospital Stay (days, mean ± SD) | 5.5 ± 1.5 | 6.0 ± 2.0 | 0.64 |
| Qmax(ml/s, mean ± SD) | 16± 6.8 | 15± 4.5 | 0.65 |
| PVR（ML） | 20± 15.0 | 25± 6.8 | 0.55 |
| Number of Urethral Dilations at 6 Months Postoperative | 2 | 3 | 0.51 |
| USS-PROM | 14.3±4.8 | 15.3±7.8 | 0.57 |
| ICIQ-SF | 2 | 3 | 0.57 |

PVR (postvoid residual urine), Qmax (maximum urine flow rate), ICIQ-SF (International Consultation on Incontinence Questionnaire - Short Form), USS-PROM (Patient-Reported Outcome Measure for Urethral Stricture Surgery)

Comparison of perioperative outcomes between mixed reality-assisted (n=32) and conventional urethroplasty (n=32). The mixed reality group demonstrated a modest reduction in operative time (118 ± 15 min vs 130 ± 18 min, mean difference -12 min; 95% CI -26.3 to +2.3, p=0.17) with comparable complication rates (15.6% vs 18.8%, p=0.72).
